# Supplementary material for: Converting cytochrome c into a DyP-like metalloenzyme
Source: Royal Society of Chemistry journal article supplement (doi:10.1039/d2dt02137d), 2022-01-01
Supplement: d2dt02137d1.pdf [file d2dt02137d1.pdf]

## SUPPLEMENTARY INFORMATION

### **Converting cytochrome *c* into a DyP-like metalloenzyme**

Issei Omura<sup>a</sup>, Koichiro Ishimori,<sup>a,b</sup> and Takeshi Uchida<sup>\*a,b</sup>

<sup>a</sup>Graduate School of Chemical Sciences and Engineering, Hokkaido University, Sapporo 060-8628, Japan

<sup>b</sup>Department of Chemistry, Faculty of Science, Hokkaido University, Sapporo 060-0810, Japan

#### **Corresponding Author**

\*Department of Chemistry, Faculty of Science, Hokkaido University, Sapporo 060-0810, Japan. E-mail: uchida@sci.hokudai.ac.jp.

**Supplementary Table 1: Oligonucleotides used for construction of expression vectors for mutants. The underlined bases signify the introduced mutations.**

| Mutants | Primers (top, sense; bottom, anti-sense)                                                          |
|---------|---------------------------------------------------------------------------------------------------|
| M80V    | 5'— ACGAAAG <u>GTG</u> ATCTTCGCGGGCATCAAA — 3'<br>5'— GAAGAT <u>CACT</u> TTTCGTGCCCCGGGATGTA — 3' |
| Y48H    | 5'— TTCACG <u>CAT</u> ACGGACGCGAACAAAAAC — 3'<br>5'— GTCCGT <u>ATGC</u> TGAAGCCCGGCGCCTG — 3'     |
| Y67H    | 5'— ATGGA <u>ACAT</u> CTCGAGAACCCGAAAAAA — 3'<br>5'— CTCGAG <u>ATGT</u> TCCATCAGCGTTTCTTC — 3'    |
| Y97H    | 5'— ATCGCG <u>CAT</u> CTGAAAAAGGCGACGAAC — 3'<br>5'— CGCGAAG <u>ACCT</u> GATCGCGCATCTGAAA — 3'    |
| P76W    | 5'— TACATC <u>TGGG</u> CACGAAAATGATCTTC — 3'<br>5'— CGTG <u>CCC</u> CAGATGTATTTTTTCGGGTT — 3'     |
| G41S    | 5'— AAAACG <u>TCT</u> CAGGCGCCGGGCTTCACG — 3'<br>5'— CGCCTG <u>GAC</u> GTTTTTCGGCCGAACAG — 3'     |
| A51V    | 5'— ACGGAC <u>GTA</u> ACAAAAACAAAGGCATC — 3'<br>5'— TTTG <u>TCA</u> CGTCCGTGTACGTGAAGCC — 3'      |
| G29D    | 5'— AAAACG <u>GAC</u> CCCAACCTGCACGGCCTG — 3'<br>5'— GTTGGG <u>GTC</u> GGTTTTGTGTTTGCCGCC — 3'    |

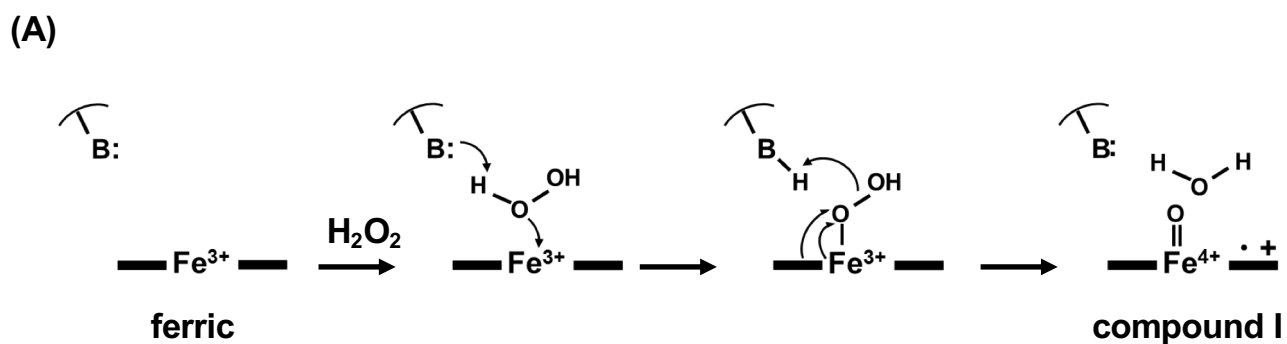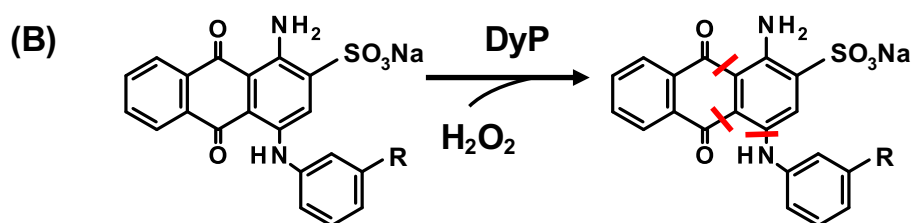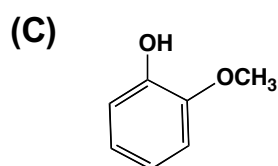

Fig. S1 (A) The mechanism of compound I formation by the reaction of DyP and  $\text{H}_2\text{O}_2$  (Sugano *et al.*, *J. Biol. Chem.*, 2007, 282, 36652–36658). (B) degradation of RB19. (C) molecular structure of guaiacol.

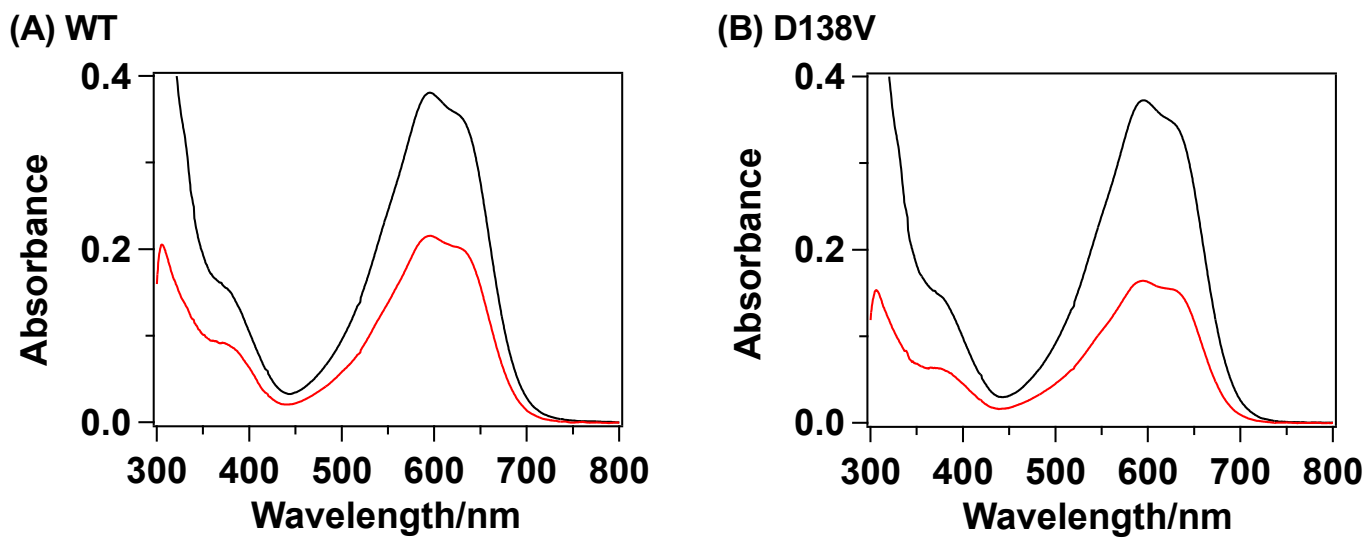

Fig. S2 Absorbance of the supernatant of culture medium with RB19 (40  $\mu$ M) of *E. coli* expressed (A) WT and (B) D138V VcDyP; 0h (black line) and 24h (red line).

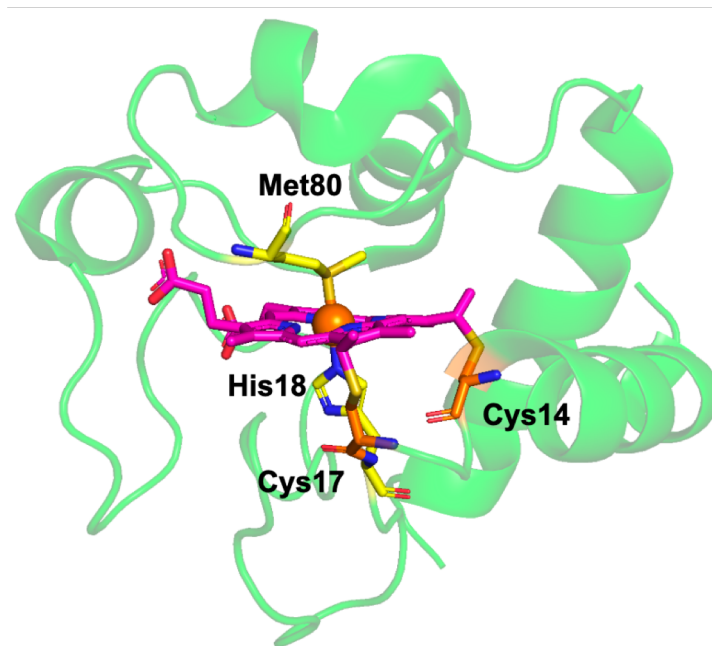

Fig. S3 X-ray crystal structure of cyt *c* (PDB ID: 6K9I)

(A)

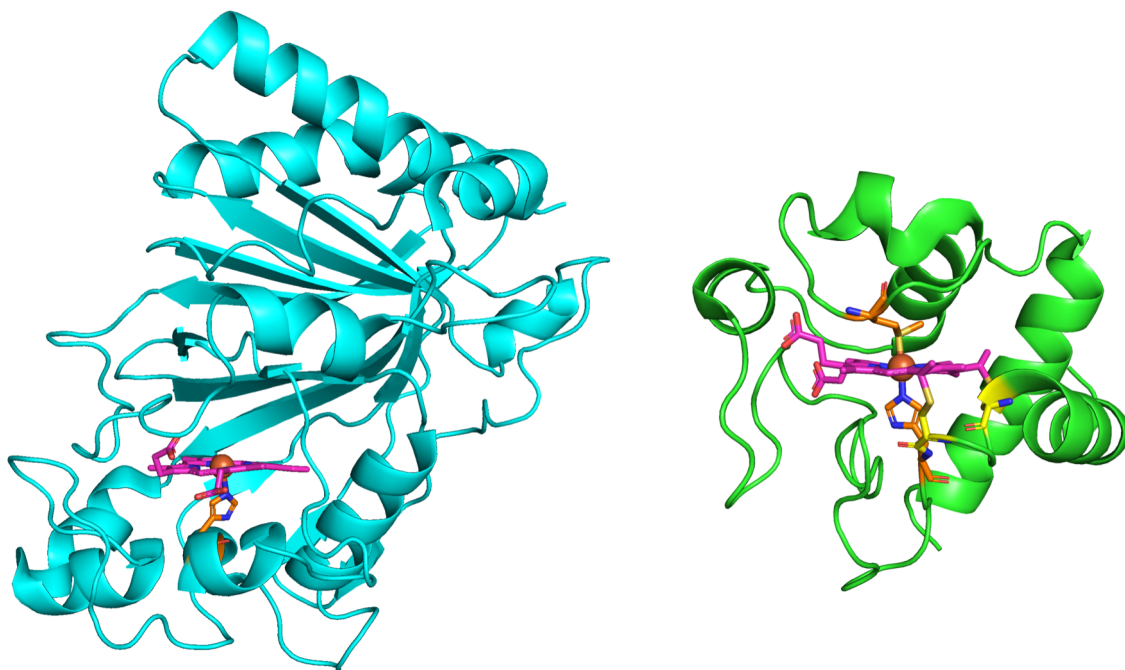

(B)

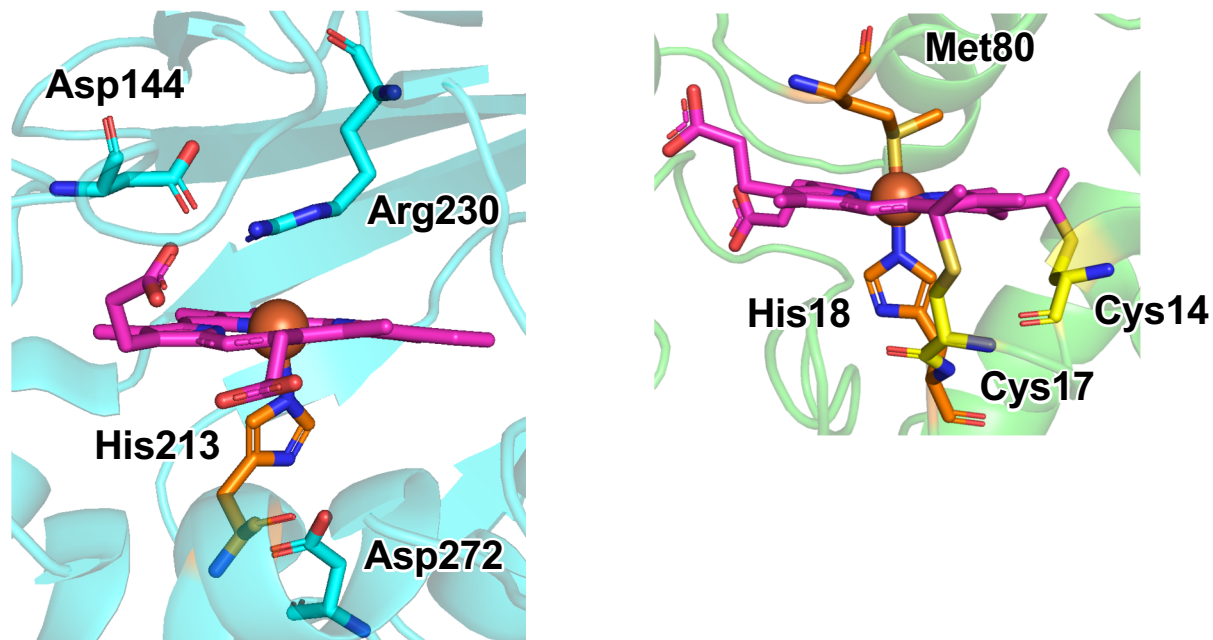

Fig. S4 Structural comparison between *VcDyP* and *cyt c*. Comparison of overall structures (A) and structures around heme (B).

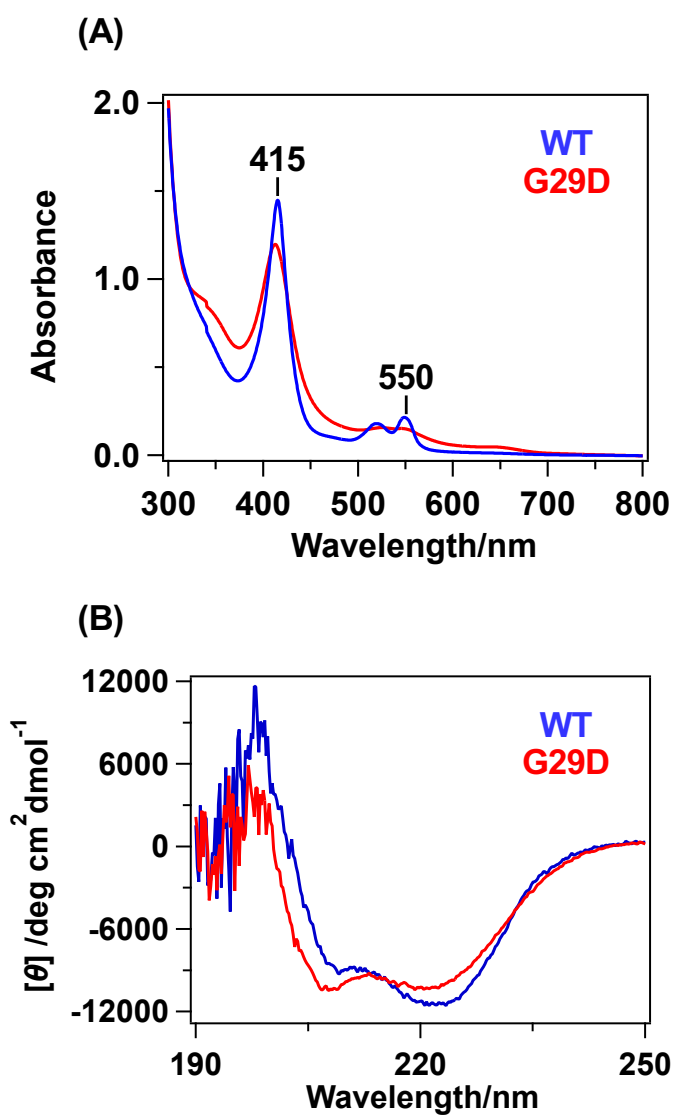

Fig. S5 (A) Absorbance of supernatant of lysate of *E. coli* expressed WT and G29D cyt *c*. (B) CD spectra of WT and G29D as purified.

(A) WT + pEC86

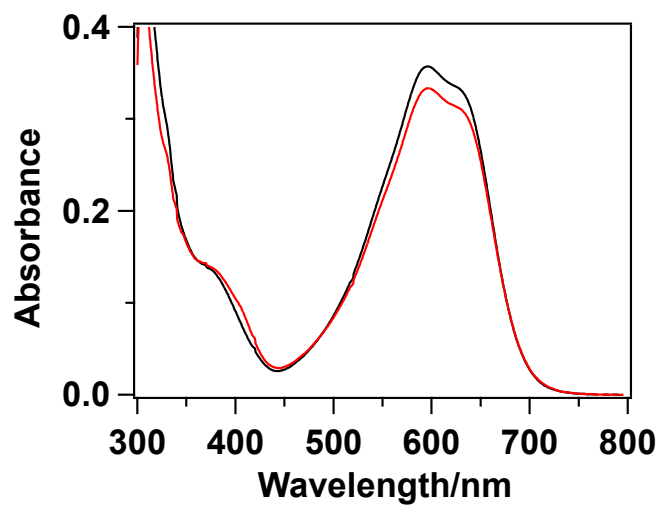

(B) G29D + pEC86

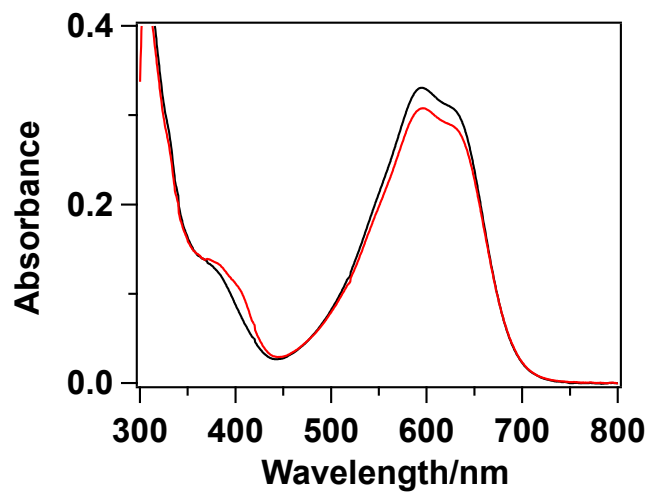

Fig. S6 Absorbance of the supernatant of culture medium with RB19 (40  $\mu$ M) of *E. coli* expressed (A) WT cyt *c* + pEC86, (B) WT cyt *c*, (C) G29D cyt *c* + pEC86, and (D) G29D cyt *c*; 0h (black line) and 24h (red line).
